# Supplementary material for: Attraction vs. Alignment as Drivers of Collective Motion
Source: Frontiers journal article supplement (doi:10.3389/fams.2021.717523), 2022-01-31
Supplement: Data_Sheet_1.pdf [file Data_Sheet_1.pdf]

# Supplementary Material

## 1 SUPPLEMENTARY VIDEOS

### Video 1

Video showing simulations of models II-V with the parameters used to generate Figure 4.

### Video 2

Video showing simulations of models VI-VIII with the parameters used to generate Figure 4.

## 2 SUPPLEMENTARY FIGURES

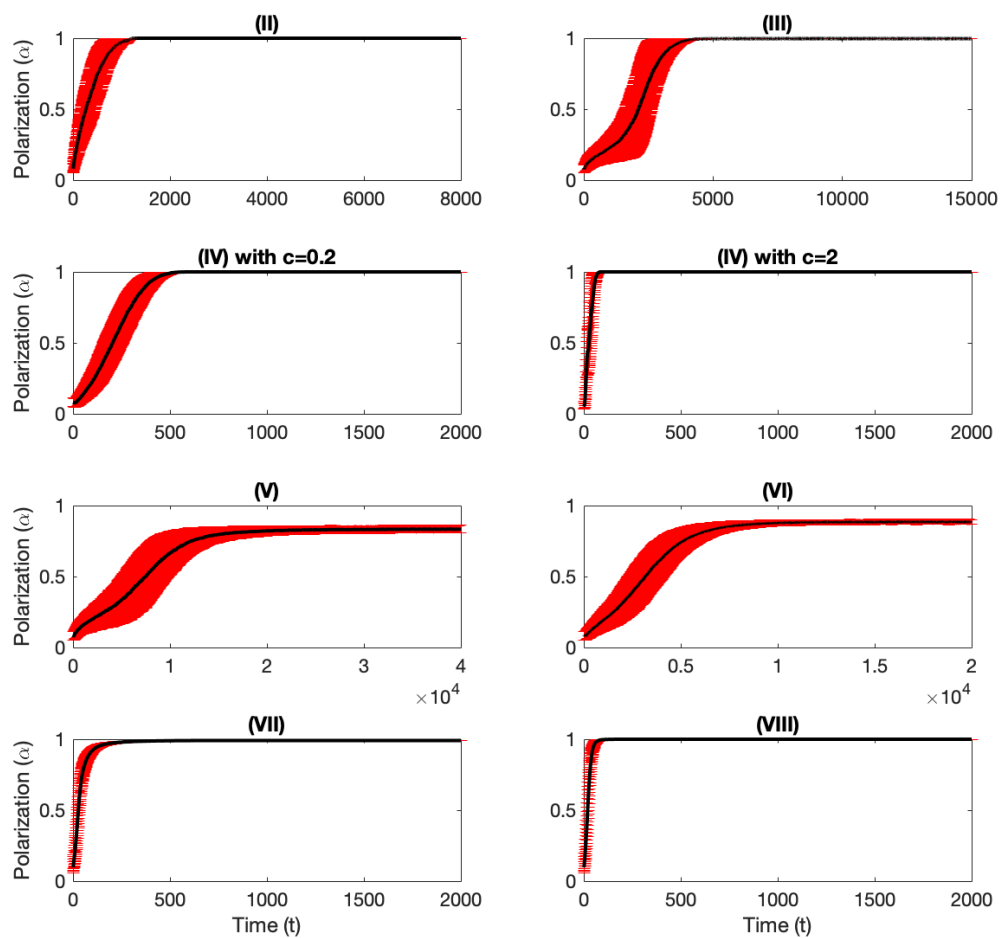

**Figure S1.** Route to polarization from random initial conditions over time for models (II)-(VIII). The black curve represents the median over the 5000 simulations and the red bars are median absolute deviation (mad) bars. The median curves presented here were combined to create Figures 4AB.

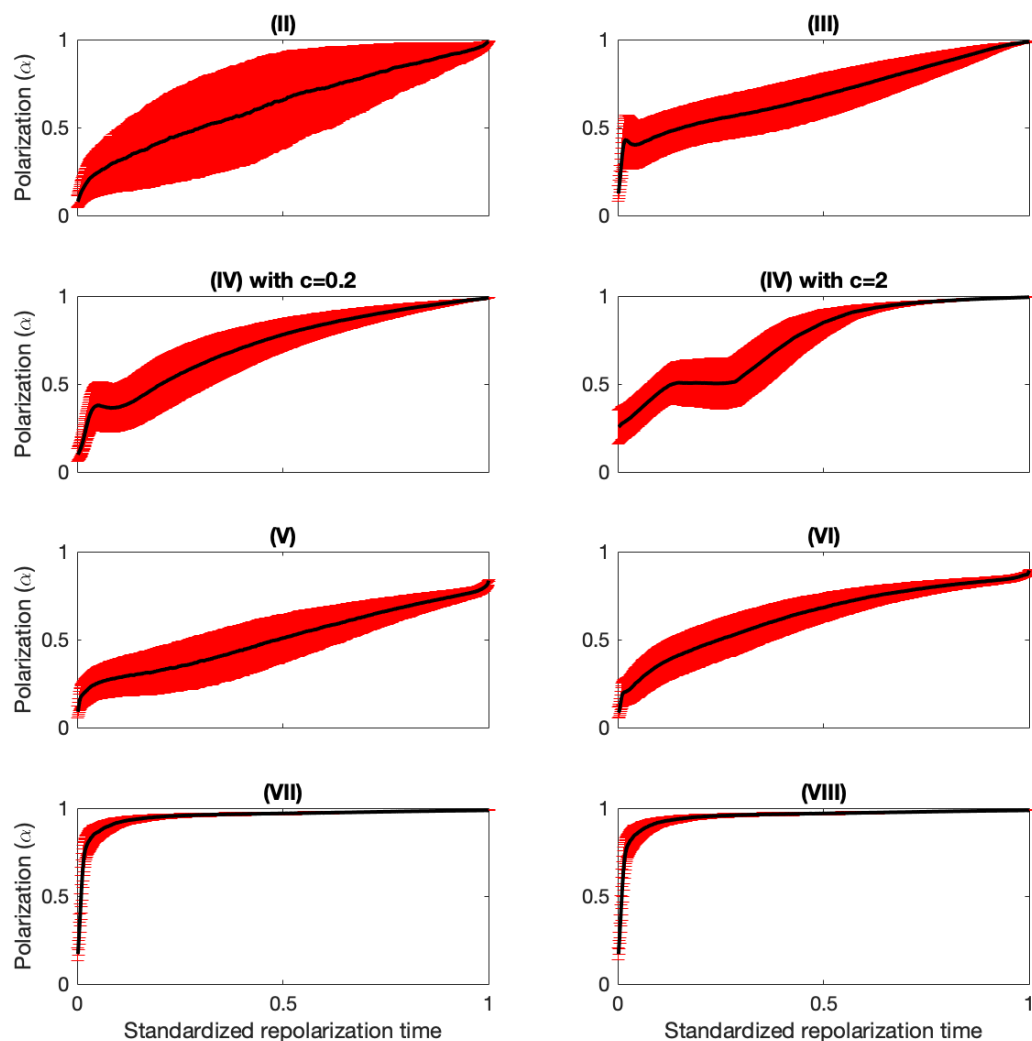

**Figure S2.** Route to repolarization over standardized repolarization time for models (II)-(VIII). The black curve represents the median over the 5000+ simulations and the red bars are median absolute deviation (mad) bars. The median curves presented here were combined to create Figure 5A.

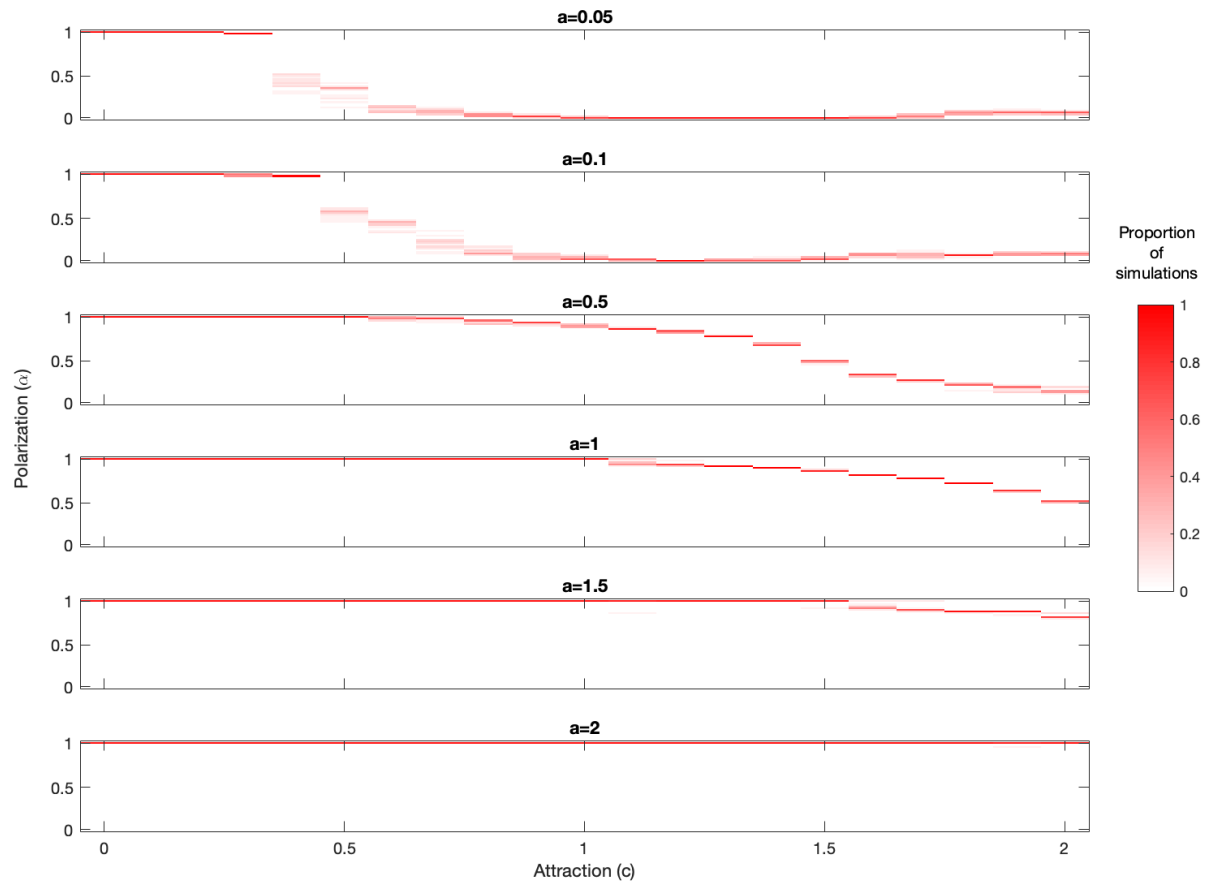

**Figure S3.** Figure showing the effect of increasing  $a$  in model VII. The other parameters used are the same as those used to create the panel for model VII in Figure 3. We see that as  $a$  increases the upper  $c$  limit for polarized group formation increases, as claimed in the main text.
